# Supplementary material for: Clustering of cancer among families of cases with Hodgkin Lymphoma (HL), Multiple Myeloma (MM), Non-Hodgkin's Lymphoma (NHL), Soft Tissue Sarcoma (STS) and control subjects
Source: PubMed Central journal article supplement (PMC2653543; doi:10.1186/1471-2407-9-70), 2009-02-27
Supplement: 1471-2407-9-70-S1.pdf [file 1471-2407-9-70-S1.pdf]

Table 1. Age distribution of cases and controls and descriptive Characteristics of the Families Studied: Numbers of first degree relatives\* stratified by relationship to the index subjects\*\*

|                                                    | HL<br>(n=316) |            | MM<br>(n=342) |            | NHL<br>(n=513) |            | STS<br>(n=357) |            | Control<br>(n=1506) |            |
|----------------------------------------------------|---------------|------------|---------------|------------|----------------|------------|----------------|------------|---------------------|------------|
| Age distribution, in years                         | n             | %          | n             | %          | n              | %          | n              | %          | n                   | %          |
| ≤ 40                                               | 183           | 57.9       | 9             | 2.6        | 63             | 12.3       | 88             | 24.6       | 356                 | 23.6       |
| >40, ≤49                                           | 56            | 17.7       | 24            | 7.0        | 78             | 15.2       | 49             | 13.7       | 221                 | 14.7       |
| > 49, ≤59                                          | 28            | 8.9        | 59            | 17.3       | 111            | 21.6       | 54             | 14.8       | 248                 | 16.5       |
| >59, ≤69                                           | 26            | 8.2        | 116           | 33.9       | 137            | 26.7       | 71             | 19.9       | 362                 | 24.0       |
| > 69                                               | 23            | 7.3        | 134           | 39.2       | 124            | 24.2       | 96             | 26.9       | 319                 | 21.2       |
| Mean ± SD                                          | 40.2 ± 0.90   |            | 64.7 ± 0.60   |            | 57.7 ± 0.63    |            | 54.7 ± 0.90    |            | 54.1 ± 0.42         |            |
|                                                    | n             | mean ± SD  | n             | mean ± SD  | n              | mean ± SD  | n              | mean ± SD  | n                   | mean ± SD  |
| Siblings                                           | 946           | 3.08 ± 2.6 | 1390          | 4.84 ± 3.2 | 2070           | 4.88 ± 3.3 | 1313           | 4.48 ± 3.0 | 5662                | 4.55 ± 3.1 |
| Brothers                                           | 505           | 1.91 ± 1.6 | 722           | 2.42 ± 1.9 | 1080           | 2.46 ± 2.0 | 660            | 2.18 ± 1.7 | 2986                | 2.30 ± 1.9 |
| Sisters                                            | 441           | 1.65 ± 1.3 | 668           | 2.29 ± 1.8 | 990            | 2.24 ± 1.8 | 653            | 2.14 ± 1.7 | 2676                | 2.09 ± 1.6 |
| Children                                           | 424           |            | 983           |            | 1301           |            | 796            |            | 3385                |            |
| Sons                                               | 224           | 0.86 ± .95 | 518           | 1.77 ± 1.2 | 661            | 1.53 ± 1.5 | 414            | 1.39 ± 1.3 | 1788                | 1.42 ± 1.2 |
| Daughters                                          | 200           | 0.79 ± 1.0 | 465           | 1.60 ± 1.3 | 640            | 1.51 ± 1.4 | 382            | 1.36 ± 1.4 | 1597                | 1.31 ± 1.2 |
| Mean first degree family members including parents | 6.33          |            | 8.94          |            | 8.57           |            | 7.93           |            | 8.01                |            |

\* first degree relatives include parents, siblings and offspring of the index subjects.

\*\*index subjects were omitted
