# Supplementary material for: Clustering of cancer among families of cases with Hodgkin Lymphoma (HL), Multiple Myeloma (MM), Non-Hodgkin's Lymphoma (NHL), Soft Tissue Sarcoma (STS) and control subjects
Source: PubMed Central journal article supplement (PMC2653543; doi:10.1186/1471-2407-9-70), 2009-02-27
Supplement: 1471-2407-9-70-S2.pdf [file 1471-2407-9-70-S2.pdf]

Table 2. Descriptive Characteristics of the Families Studied: Family size\*\*\* categorized as small, medium, large and largest excluding the index subjects.

|             | HL  |               | MM  |               | NHL |               | STS |               | Controls |               |
|-------------|-----|---------------|-----|---------------|-----|---------------|-----|---------------|----------|---------------|
| Family size | n   | % of families | n   | % of families | n   | % of families | n   | % of families | n        | % of families |
| Small       | 187 | 59.2          | 140 | 40.9          | 227 | 44.2          | 177 | 49.6          | 735      | 48.8          |
| Medium      | 64  | 20.2          | 58  | 17.0          | 83  | 16.2          | 60  | 16.8          | 219      | 14.5          |
| Large       | 36  | 11.4          | 51  | 14.9          | 82  | 16.0          | 60  | 16.8          | 271      | 18.0          |
| Largest     | 29  | 9.2           | 93  | 27.2          | 121 | 23.6          | 60  | 16.8          | 281      | 18.7          |

Chi-square = 61.5, df = 12, p < .0001

Separate Chi-squared values: for HL  $\chi^2=31.57$ , df=3, p<0.0001; for MM  $\chi^2=16.28$ , df=3, p<0.001; for NHL  $\chi^2=7.89$ , df=3, p<0.05; for STS  $\chi^2=1.80$ , df=3, p>0.05.

\*\*\* Small: (<= 2 siblings/offspring plus parents); Medium: (>= 3 and <= 5 siblings/offspring plus parents) Large: (>= 6 and <= 8 siblings/offspring plus parents); Largest: (>=9siblings/ offspring plus parents)
