# Supplementary material for: Clustering of cancer among families of cases with Hodgkin Lymphoma (HL), Multiple Myeloma (MM), Non-Hodgkin's Lymphoma (NHL), Soft Tissue Sarcoma (STS) and control subjects
Source: PubMed Central journal article supplement (PMC2653543; doi:10.1186/1471-2407-9-70), 2009-02-27
Supplement: 1471-2407-9-70-S3.pdf [file 1471-2407-9-70-S3.pdf]

Table 3. Descriptive Characteristics of the Families Studied: Distribution of number of reported generations with at least one family member affected with cancer excluding the index subjects.

| Generations Affected             | HL                 |                              | MM                 |                              | NHL                |                              | STS                |                              | Controls           |                              |
|----------------------------------|--------------------|------------------------------|--------------------|------------------------------|--------------------|------------------------------|--------------------|------------------------------|--------------------|------------------------------|
|                                  | Number of families | OR adj <sup>#</sup> (95% CI) | Number of families | OR adj <sup>#</sup> (95% CI) | Number of families | OR adj <sup>#</sup> (95% CI) | Number of families | OR adj <sup>#</sup> (95% CI) | Number of families | OR adj <sup>#</sup> (95% CI) |
| Zero                             | 211                | 1                            | 179                | 1                            | 288                | 1                            | 224                | 1                            | 1012               | Reference                    |
| One                              | 96                 | <b>1.85(1.37,2.51)</b>       | 136                | <b>1.37(1.05,1.79)</b>       | 178                | 1.34(1.07,1.68)              | 114                | <b>1.29(1.00,1.68)</b>       | 422                |                              |
| Two or more generations affected | 9                  | 1.93(0.89,4.17)              | 27                 | 1.24(0.76,2.01)              | 47                 | <b>2.01(1.34,3.01)</b>       | 19                 | 1.09(0.63,1.90)              | 72                 |                              |

<sup>#</sup>All odds ratios were adjusted for age and province of residence
