# Supplementary material for: Clustering of cancer among families of cases with Hodgkin Lymphoma (HL), Multiple Myeloma (MM), Non-Hodgkin's Lymphoma (NHL), Soft Tissue Sarcoma (STS) and control subjects
Source: PubMed Central journal article supplement (PMC2653543; doi:10.1186/1471-2407-9-70), 2009-02-27
Supplement: 1471-2407-9-70-S4.pdf [file 1471-2407-9-70-S4.pdf]

Table 4. Descriptive Characteristics of the Families Studied: Distribution of reported numbers\*\*\*\* of family members affected with cancer excluding the index subjects.

| Number of Affected Family Members         | HL                 |               | MM                 |               | NHL                |               | STS                |               | Controls           |               |
|-------------------------------------------|--------------------|---------------|--------------------|---------------|--------------------|---------------|--------------------|---------------|--------------------|---------------|
|                                           | Number of families | % of families | Number of families | % of families | Number of families | % of families | Number of families | % of families | Number of families | % of families |
| Zero                                      | 211                | 66.8          | 179                | 52.3          | 288                | 56.1          | 224                | 62.7          | 1012               | 67.2          |
| One                                       | 88                 | 27.8          | 103                | 30.1          | 151                | 29.4          | 96                 | 26.9          | 369                | 24.5          |
| Two                                       | 13                 | 4.1           | 34                 | 9.9           | 52                 | 10.1          | 25                 | 7.0           | 86                 | 5.7           |
| Three                                     | 4                  | 1.3           | 19                 | 5.6           | 17                 | 3.3           | 9                  | 2.5           | 29                 | 1.9           |
| Four                                      | 0                  | 0             | 5                  | 1.5           | 5                  | 1.0           | 1                  | 0.3           | 8                  | 0.5           |
| Five or more                              | 0                  | 0             | 2                  | 0.6           | 0                  |               | 2                  | 0.6           | 2                  | 0.1           |
| % Affected Families                       |                    | 33.2          |                    | 47.7          |                    | 43.9          |                    | 37.8          |                    | 32.8          |
| % Two or More Affected Individuals/family |                    | 5.4           |                    | 17.6          |                    | 14.5          |                    | 10.7          |                    | 8.3           |

\*\*\*\* Chi-square = 59.8, df = 8, p < .0001 using the following categories: zero, one, ≥ 2 affected per family.
