# Supplementary material for: Clustering of cancer among families of cases with Hodgkin Lymphoma (HL), Multiple Myeloma (MM), Non-Hodgkin's Lymphoma (NHL), Soft Tissue Sarcoma (STS) and control subjects
Source: PubMed Central journal article supplement (PMC2653543; doi:10.1186/1471-2407-9-70), 2009-02-27
Supplement: 1471-2407-9-70-S5.pdf [file 1471-2407-9-70-S5.pdf]

Table 5: Cancer in family relatives stratified by age distribution

| Age distribution, in years | HL        | MM        | NHL       | STS       | Controls   |
|----------------------------|-----------|-----------|-----------|-----------|------------|
|                            | n (%)     | n (%)     | n (%)     | n (%)     | n (%)      |
| At least one parent        |           |           |           |           |            |
| ≤ 40                       | 37 (20.3) | 2 (22.2)  | 13 (20.6) | 11 (12.5) | 54 (15.2)  |
| >40, ≤49                   | 23 (41.1) | 8 (33.3)  | 24 (30.8) | 19 (38.8) | 55 (24.9)  |
| > 49, ≤59                  | 10 (35.7) | 21 (35.6) | 33 (29.7) | 13 (24.5) | 72 (29.0)  |
| >59, ≤69                   | 6 (23.1)  | 28 (24.1) | 44 (32.1) | 22 (31.0) | 102 (28.2) |
| > 69                       | 5 (21.7)  | 27 (20.1) | 39 (31.5) | 25 (26.0) | 79 (24.8)  |
| At least one sibling       |           |           |           |           |            |
| ≤ 40                       | 7 (3.8)   | 1 (11.1)  | 5 (7.9)   | 3 (3.4)   | 3 (0.8)    |
| >40, ≤49                   | 5 (8.9)   | 3 (12.5)  | 8 (10.3)  | 3 (6.1)   | 9 (4.1)    |
| > 49, ≤59                  | 7 (25.0)  | 15 (25.4) | 21 (18.9) | 8 (15.1)  | 24 (9.7)   |
| >59, ≤69                   | 4 (15.4)  | 28 (24.1) | 42 (30.7) | 14 (19.7) | 74 (20.4)  |
| > 69                       | 8 (34.8)  | 47 (35.1) | 33 (26.6) | 30 (31.2) | 78 (24.5)  |
| At least one child         |           |           |           |           |            |
| ≤ 40                       | 0 (0.0)   | 0 (0.0)   | 0 (0.0)   | 0 (0.0)   | 0 (0.0)    |
| >40, ≤49                   | 0 (0.0)   | 1 (4.2)   | 0 (0.0)   | 0 (0.0)   | 1 (0.5)    |
| > 49, ≤59                  | 1 (3.6)   | 2 (3.4)   | 4 (3.6)   | 0 (0.0)   | 1 (0.4)    |
| >59, ≤69                   | 0 (0.0)   | 0 (0.0)   | 2 (1.5)   | 2 (2.8)   | 6 (1.7)    |
| > 69                       | 1 (4.3)   | 8 (6.0)   | 4 (3.2)   | 2 (2.1)   | 10 (3.1)   |
