# Supplementary material for: Clustering of cancer among families of cases with Hodgkin Lymphoma (HL), Multiple Myeloma (MM), Non-Hodgkin's Lymphoma (NHL), Soft Tissue Sarcoma (STS) and control subjects
Source: PubMed Central journal article supplement (PMC2653543; doi:10.1186/1471-2407-9-70), 2009-02-27
Supplement: 1471-2407-9-70-S6.pdf [file 1471-2407-9-70-S6.pdf]

Table 6. Comparisons of families of cases of HL, MM, NHL, STS to families of controls: relationship of relatives with cancer to index subjects.

|                                                  | HL                |                                   | MM                |                                   | NHL               |                                   | STS               |                                   | Controls          |                                   |
|--------------------------------------------------|-------------------|-----------------------------------|-------------------|-----------------------------------|-------------------|-----------------------------------|-------------------|-----------------------------------|-------------------|-----------------------------------|
|                                                  | n (%) of families | Adjusted OR <sup>#</sup> (95% CI) | n (%) of families | Adjusted OR <sup>#</sup> (95% CI) | n (%) of families | Adjusted OR <sup>#</sup> (95% CI) | n (%) of families | Adjusted OR <sup>#</sup> (95% CI) | n (%) of families | Adjusted OR <sup>#</sup> (95% CI) |
| Any first degree relative affected:              |                   |                                   |                   |                                   |                   |                                   |                   |                                   |                   |                                   |
| Yes                                              | 104 (32.9)        | <b>1.79 (1.33,2.42)</b>           | 164 (47.9)        | <b>1.38 (1.07, 1.78)</b>          | 225 (43.9)        | <b>1.43 (1.15, 1.77)</b>          | 133 (37.2)        | <b>1.30 (1.00, 1.68)</b>          | 498 (33.1)        |                                   |
| No                                               | 202 (63.9)        |                                   | 169 (49.4)        |                                   | 276 (53.8)        |                                   | 209 (58.5)        |                                   | 973 (64.6)        |                                   |
| Unkonown/missing                                 | 10 (3.2)          |                                   | 9 (2.6)           |                                   | 12 (2.3)          |                                   | 15 (4.2)          |                                   | 35 (2.3)          |                                   |
| OR adjusted for family size                      |                   | <b>2.02 (1.36, 3.01)</b>          |                   | 1.32 (0.95, 1.84)                 |                   | 1.01 (0.98, 1.05)                 |                   | 1.14 (0.81, 1.60)                 |                   |                                   |
| Parents:                                         |                   |                                   |                   |                                   |                   |                                   |                   |                                   |                   |                                   |
| 1. Neither affected                              | 235 (74.4)        |                                   | 256 (74.8)        |                                   | 360 (70.2)        |                                   | 267 (74.8)        |                                   | 1144 (76.0)       |                                   |
| Mother affected, father unaffected               | 36 (11.4)         | 1.50 (0.98, 2.29)                 | 33 (9.6)          | 0.91 (0.60, 1.39)                 | 69 (13.4)         | 1.31 (0.95, 1.79)                 | 38 (10.6)         | 1.14 (0.77, 1.68)                 | 153 (10.2)        |                                   |
| Father affected, mother unaffected               | 36 (11.4)         | 1.37 (0.91, 2.08)                 | 37 (10.8)         | 0.79 (0.53, 1.17)                 | 64 (12.5)         | 1.06 (0.77, 1.45)                 | 42 (11.8)         | 1.10 (0.77, 1.59)                 | 169 (11.2)        |                                   |
| both parents affected                            | 9 (2.8)           | 1.64 (0.74, 3.64)                 | 16 (4.7)          | 1.53 (0.82, 2.83)                 | 20 (3.9)          | 1.38 (0.79, 2.41)                 | 10 (2.8)          | 0.99 (0.49, 2.02)                 | 40 (2.6)          |                                   |
| 2. At least one affected parent                  | 81 (25.6)         | <b>1.57 (1.15, 2.14)</b>          | 86 (25.1)         | 0.91 (0.68, 1.22)                 | 153 (29.8)        | 1.25 (0.99, 1.58)                 | 90 (25.2)         | 1.12 (0.85, 1.48)                 | 362 (24.0)        |                                   |
| Siblings:                                        |                   |                                   |                   |                                   |                   |                                   |                   |                                   |                   |                                   |
| 1. At least one affected sibling                 | 31 (9.8)          | <b>1.95 (1.23, 3.08)</b>          | 94 (27.5)         | <b>1.60 (1.19, 2.16)</b>          | 109 (21.2)        | <b>1.66 (1.26, 2.18)</b>          | 58 (16.2)         | 1.30 (0.92, 1.84)                 | 188 (12.5)        |                                   |
| OR adjusted for total number of siblings         |                   | <b>1.94 (1.12, 3.34)</b>          |                   | <b>1.71 (1.22, 2.40)</b>          |                   | <b>1.68 (1.23, 2.31)</b>          |                   | 1.35 (0.91, 2.00)                 |                   |                                   |
| 2. At least one affected brother                 | 15 (4.7)          | 1.53 (0.84, 2.79)                 | 55 (16.1)         | 1.39 (0.97, 2.00)                 | 63 (12.3)         | <b>1.47 (1.05, 2.07)</b>          | 33 (9.2)          | 1.13 (0.74, 1.73)                 | 114 (7.6)         |                                   |
| OR adjusted for total number of brothers         |                   | 1.74 (0.93, 3.25)                 |                   | <b>1.47 (1.01, 2.13)</b>          |                   | <b>1.57 (1.10, 2.23)</b>          |                   | 1.17 (0.75, 1.83)                 |                   |                                   |
| 3. At least one affected sister                  | 17 (5.4)          | <b>1.89 (1.05, 3.38)</b>          | 54 (15.8)         | <b>1.66 (1.14, 2.40)</b>          | 56 (10.9)         | <b>1.52 (1.07, 2.17)</b>          | 32 (9.0)          | 1.34 (0.86, 2.08)                 | 100 (6.6)         |                                   |
| OR adjusted for total number of sisters          |                   | 1.79 (0.97, 3.29)                 |                   | <b>1.48 (1.01, 2.18)</b>          |                   | 1.39 (0.96, 2.02)                 |                   | 1.24 (0.78, 1.96)                 |                   |                                   |
| Children:                                        |                   |                                   |                   |                                   |                   |                                   |                   |                                   |                   |                                   |
| 1. At least one affected child                   | 2 (0.6)           |                                   | 11 (3.2)          |                                   | 10 (1.9)          |                                   | 4 (1.1)           |                                   | 18 (1.2)          |                                   |
| 1. At least one affected male                    | 61 (19.3)         | <b>1.70 (1.20, 2.41)</b>          | 101 (29.5)        | 1.18 (0.90, 1.56)                 | 142 (27.7)        | <b>1.38 (1.08, 1.76)</b>          | 78 (21.8)         | 1.11 (0.82, 1.49)                 | 301 (20.0)        |                                   |
| OR adjusted for total number of male relatives   |                   | <b>1.74 (1.17, 2.60)</b>          |                   | 1.17 (0.85, 1.61)                 |                   | <b>1.38 (1.04, 1.82)</b>          |                   | 1.04 (0.73, 1.47)                 |                   |                                   |
| 2. At least one affected female                  | 59 (18.7)         | <b>1.67 (1.18, 2.38)</b>          | 102 (29.8)        | <b>1.46 (1.10, 1.94)</b>          | 127 (24.8)        | <b>1.31 (1.02, 1.67)</b>          | 76 (21.3)         | 1.20 (0.89, 1.62)                 | 282 (18.7)        |                                   |
| OR adjusted for total number of female relatives |                   | <b>1.82 (1.21, 2.76)</b>          |                   | <b>1.50 (1.08, 2.07)</b>          |                   | 1.14 (0.85, 1.53)                 |                   | 1.05 (0.73, 1.51)                 |                   |                                   |

Families ascertained through control subjects constituted the reference group. Index subjects were omitted from these analyses.

<sup>#</sup>All odds ratios were adjusted for age and province of residence
