# Supplementary material for: Clustering of cancer among families of cases with Hodgkin Lymphoma (HL), Multiple Myeloma (MM), Non-Hodgkin's Lymphoma (NHL), Soft Tissue Sarcoma (STS) and control subjects
Source: PubMed Central journal article supplement (PMC2653543; doi:10.1186/1471-2407-9-70), 2009-02-27
Supplement: 1471-2407-9-70-S7.pdf [file 1471-2407-9-70-S7.pdf]

Table 7. Characteristics of index subjects among those with and without a family history of cancer

|                                                              | HL  |      | Age/Province<br>Adjusted OR (95%<br>CI) | MM  |      | Age/Province<br>Adjusted OR<br>(95% CI) | NHL |      | Age/Province<br>Adjusted OR<br>(95% CI) | STS |      | Age/Province<br>Adjusted OR<br>(95% CI) | Controls |                   |
|--------------------------------------------------------------|-----|------|-----------------------------------------|-----|------|-----------------------------------------|-----|------|-----------------------------------------|-----|------|-----------------------------------------|----------|-------------------|
|                                                              | n   | %    |                                         | n   | %    |                                         | n   | %    |                                         | n   | %    |                                         | n        | %                 |
| <b>Pesticide Exposure and Family History of Cancer</b>       |     |      |                                         |     |      |                                         |     |      |                                         |     |      |                                         |          |                   |
| Pesticide Exposure(-) and Family History of Cancer(-)        | 155 | 49.1 | reference                               | 145 | 42.4 | reference                               | 215 | 41.9 | reference                               | 172 | 48.2 | reference                               | 778      | 51.7              |
| Pesticide Exposure (+) and Family History of Cancer (-)      | 56  | 17.7 | 1.12 (0.77, 1.64)                       | 34  | 9.9  | 0.85 (0.56, 1.29)                       | 73  | 14.2 | 1.23 (0.89, 1.68)                       | 52  | 14.6 | 1.00 (0.70,1.43)                        | 234      | 15.5              |
| Pesticide Exposure(-) and Family History of Cancer(+)        | 85  | 26.9 | <b>2.25 (1.61, 3.15)</b>                | 112 | 32.8 | 1.18 (0.88, 1.58)                       | 161 | 31.4 | <b>1.43 (1.12, 1.83)</b>                | 95  | 26.6 | 1.25 (0.93, 1.68)                       | 364      | 24.2              |
| Pesticide Exposure (+) and Family History of Cancer(+)       | 20  | 6.3  | 1.17 (0.67, 2.01)                       | 51  | 14.9 | <b>1.69 (1.14, 2.51)</b>                | 64  | 12.5 | <b>1.72 (1.21, 2.45)</b>                | 38  | 10.6 | 1.30 (0.86,1.98)                        | 130      | 8.6               |
| <b>Personal Smoking History and Family History of Cancer</b> |     |      |                                         |     |      |                                         |     |      |                                         |     |      |                                         |          |                   |
| Nonsmoker and Family History of cancer(-)                    | 98  | 31.6 | reference                               | 44  | 13.1 | reference                               | 95  | 19.0 | reference                               | 91  | 26.3 | reference                               | 383      | 26.0              |
| Current or exsmoker and Family History of Cancer(-)          | 108 | 34.8 | 1.20 (0.85, 1.70)                       | 132 | 39.2 | <b>1.46 (1.01, 2.12)</b>                | 185 | 36.9 | 1.04 (0.79, 1.38)                       | 125 | 36.1 | 0.85 (0.63, 1.15)                       | 606      | 41.2              |
| Nonsmoker and Family History of Cancer(+)                    | 30  | 9.7  | <b>1.68 (1.01, 2.78)</b>                | 43  | 12.8 | <b>1.73 (1.07, 2.80)</b>                | 65  | 13.0 | 1.53 (1.05, 2.22)                       | 40  | 11.6 | 1.11 (0.72, 1.71)                       | 143      | 9.7               |
| Current or exsmoker and Family History of Cancer(+)          | 4   | 23.9 | <b>2.34 (1.57, 3.48)</b>                | 118 | 35.0 | <b>1.79 (1.22, 2.63)</b>                | 156 | 31.1 | <b>1.45 (1.07, 1.96)</b>                | 90  | 26.0 | 1.14 (0.81, 1.61)                       | 340      | 23.1              |
| <b>Age at diagnosis (recruitment for controls)*</b>          |     |      |                                         |     |      |                                         |     |      |                                         |     |      |                                         |          |                   |
|                                                              |     |      | Mean ± SD                               |     |      | Mean ± SD                               |     |      | Mean ± SD                               |     |      | Mean ± SD                               |          | Mean ± SD         |
| Family history of Cancer (-)                                 |     |      | 37.7 ± 15                               |     |      | 64.3 ± 11                               |     |      | 55.8 ± 15                               |     |      | 51.8 ± 18                               |          | 51.6 ± 17         |
| Family history of Cancer (+)                                 |     |      | 45.0 ± 15                               |     |      | 65.1 ± 11                               |     |      | 60.3 ± 13                               |     |      | 59.9 ± 15                               |          | 59.3 ± 14         |
| T-test (p)                                                   |     |      | -3.95 (<0.0001)                         |     |      | - 0.71 (0.48)                           |     |      | - 3.71 (0.0002)                         |     |      | - 4.78 (< 0.0001)                       |          | - 9.35 (< 0.0001) |

\* All these comparisons are within the case or control category.
